# Supplementary material for: Tuning phase structures of a symmetrical diblock copolymer with a patterned electric field
Source: Royal Society of Chemistry journal article supplement (doi:10.1039/c5sm03154k), 2016-01-01
Supplement: c5sm03154k1.pdf [file c5sm03154k1.pdf]

# Tuning Phase Structures of a Symmetrical Diblock Copolymer with a Patterned Electric Field

Di Kan and Xuehao He\*

*Department of Chemistry, School of Science, Tianjin University, and Collaborative Innovation*

*Center of Chemical Science and Engineering (Tianjin), Tianjin 300072, China*

\*Email: [xhhe@tju.edu.cn](mailto:xhhe@tju.edu.cn)

## Supporting information

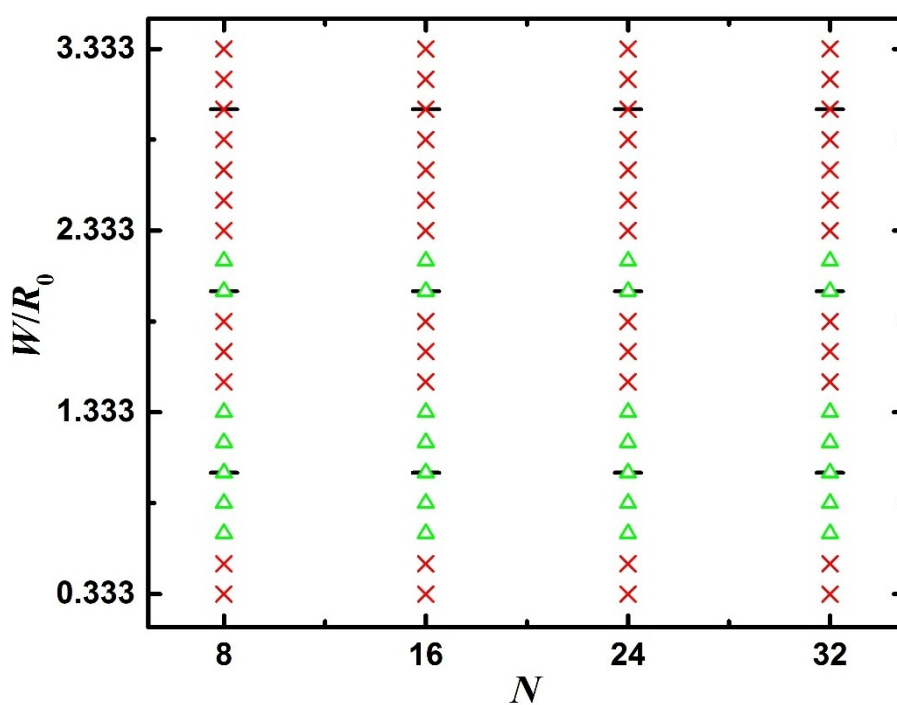

S1 Morphology diagram of a diblock copolymer thin film with  $f = 0.5$ ,  $\chi_{AB}N = 29.1$  and Kuhn length  $b_B = 1.4b_A$ . The diagram shows the equilibrium configuration in the confined space without electric field as a function of a diblock copolymer length  $N$  and film thickness  $W$ . Integer multiples of equilibrium phase period  $R_0$  are indicated with horizontal black bars ( $R_0 \approx 5.25R_g$  for  $N = 8, 16, 24, 32$ ). Red crosses and green triangles indicate perpendicular phase structures and parallel configurations, respectively.

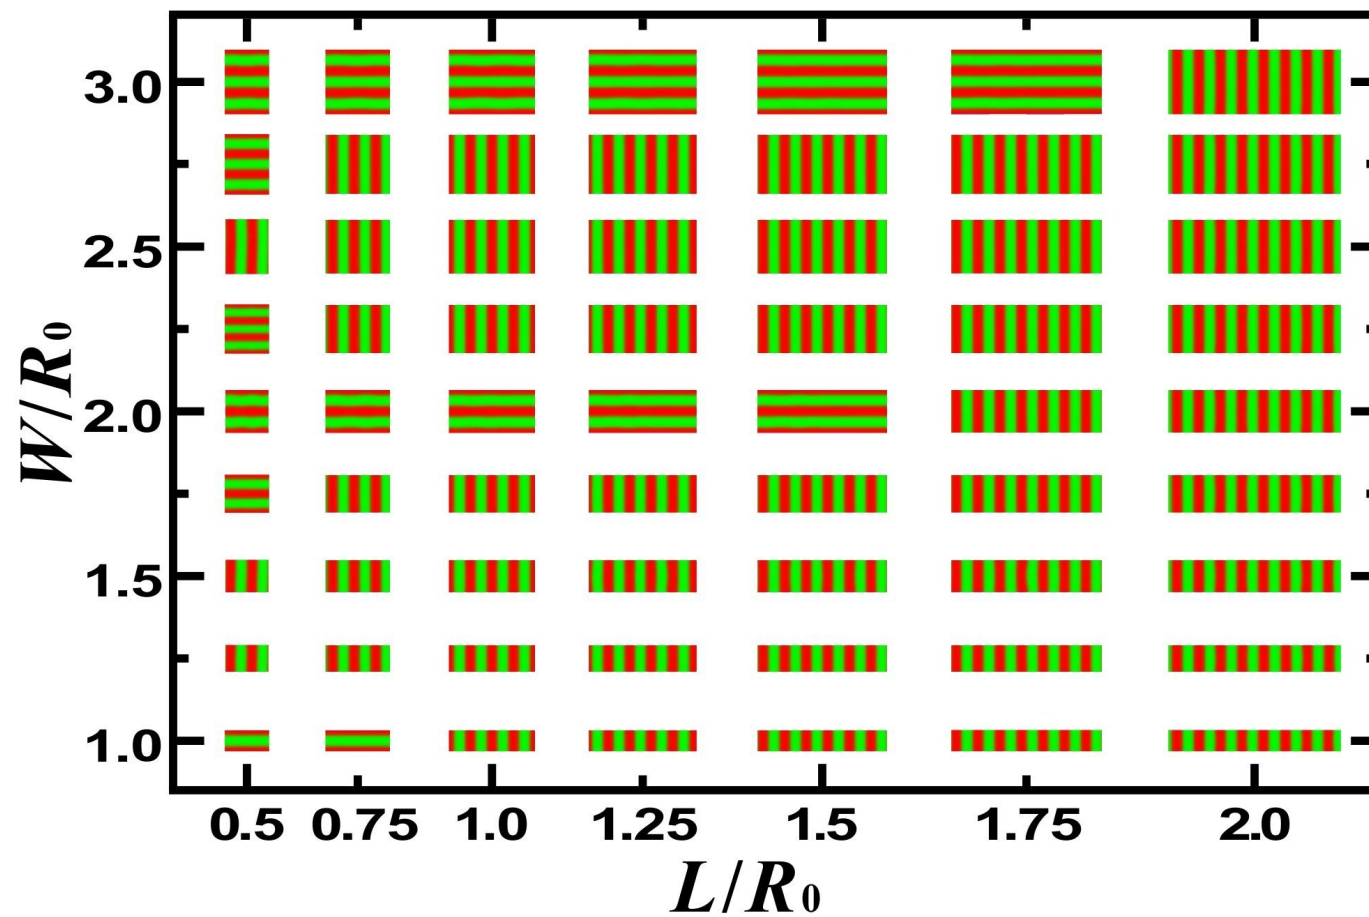

(a)

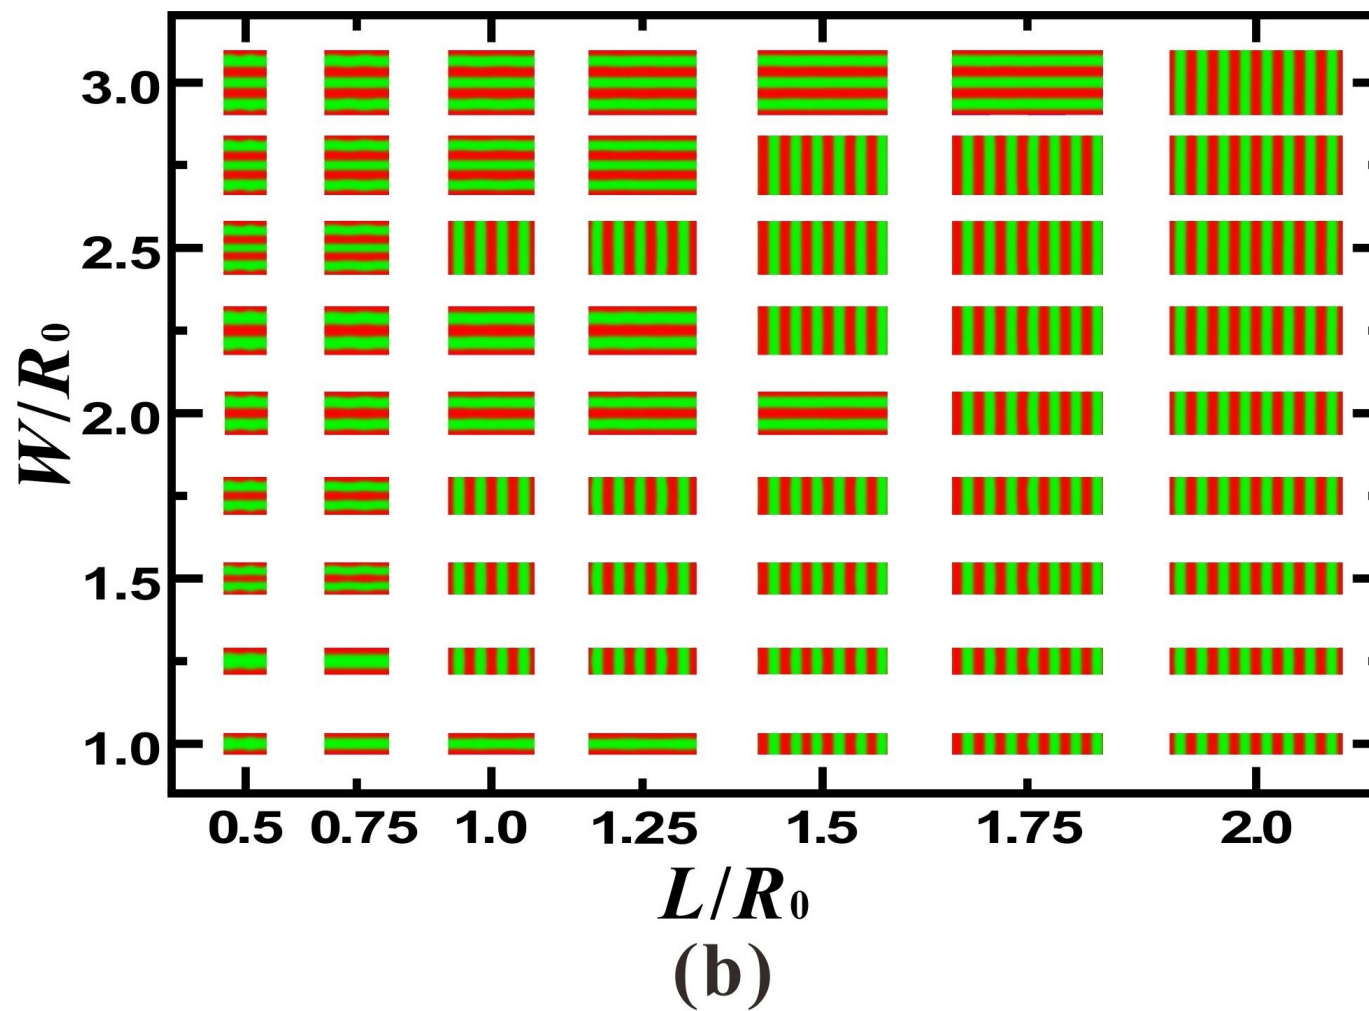

S2 Phase diagram of AB diblock copolymer melts depending on the film thickness ( $W$ ) and the size of electrode ( $L$ ) under alternatively distributed electric field. (a)  $U_{\text{high}} = 20.0$  V, (b)  $U_{\text{high}} = 40.0$  V. Here,  $U_{\text{low}} = 10.0$  V,  $\kappa_A = 6.0$  and  $\kappa_B = 2.5$ .

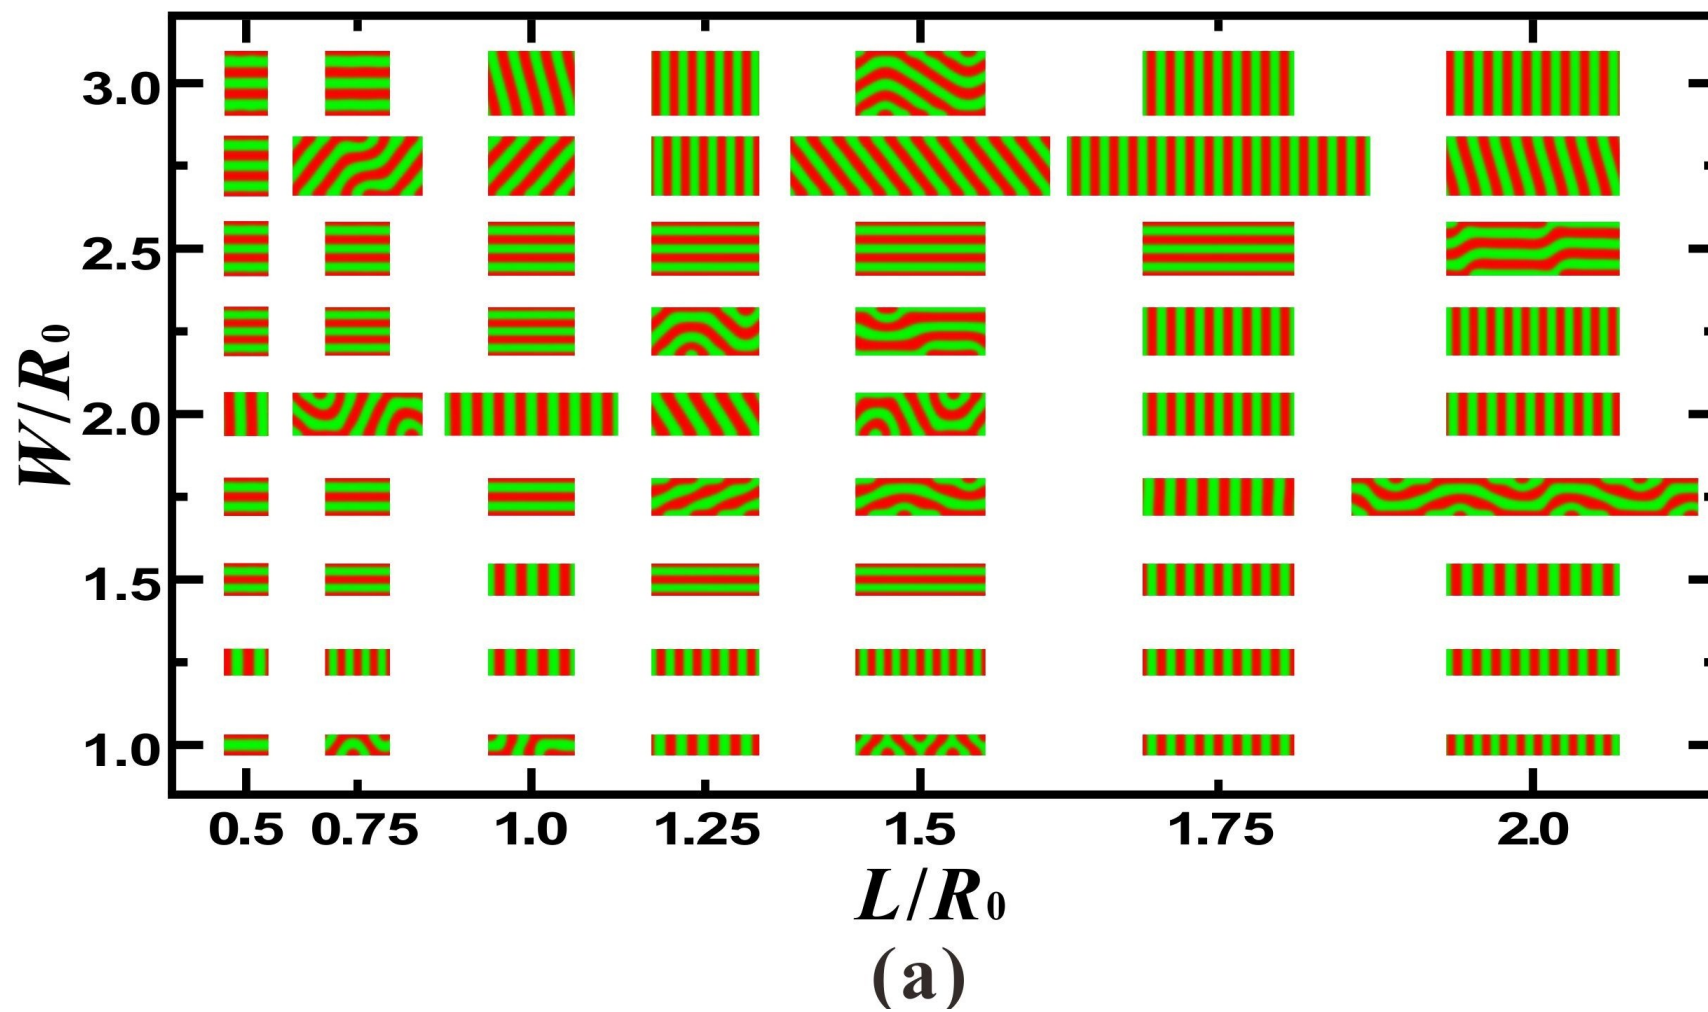

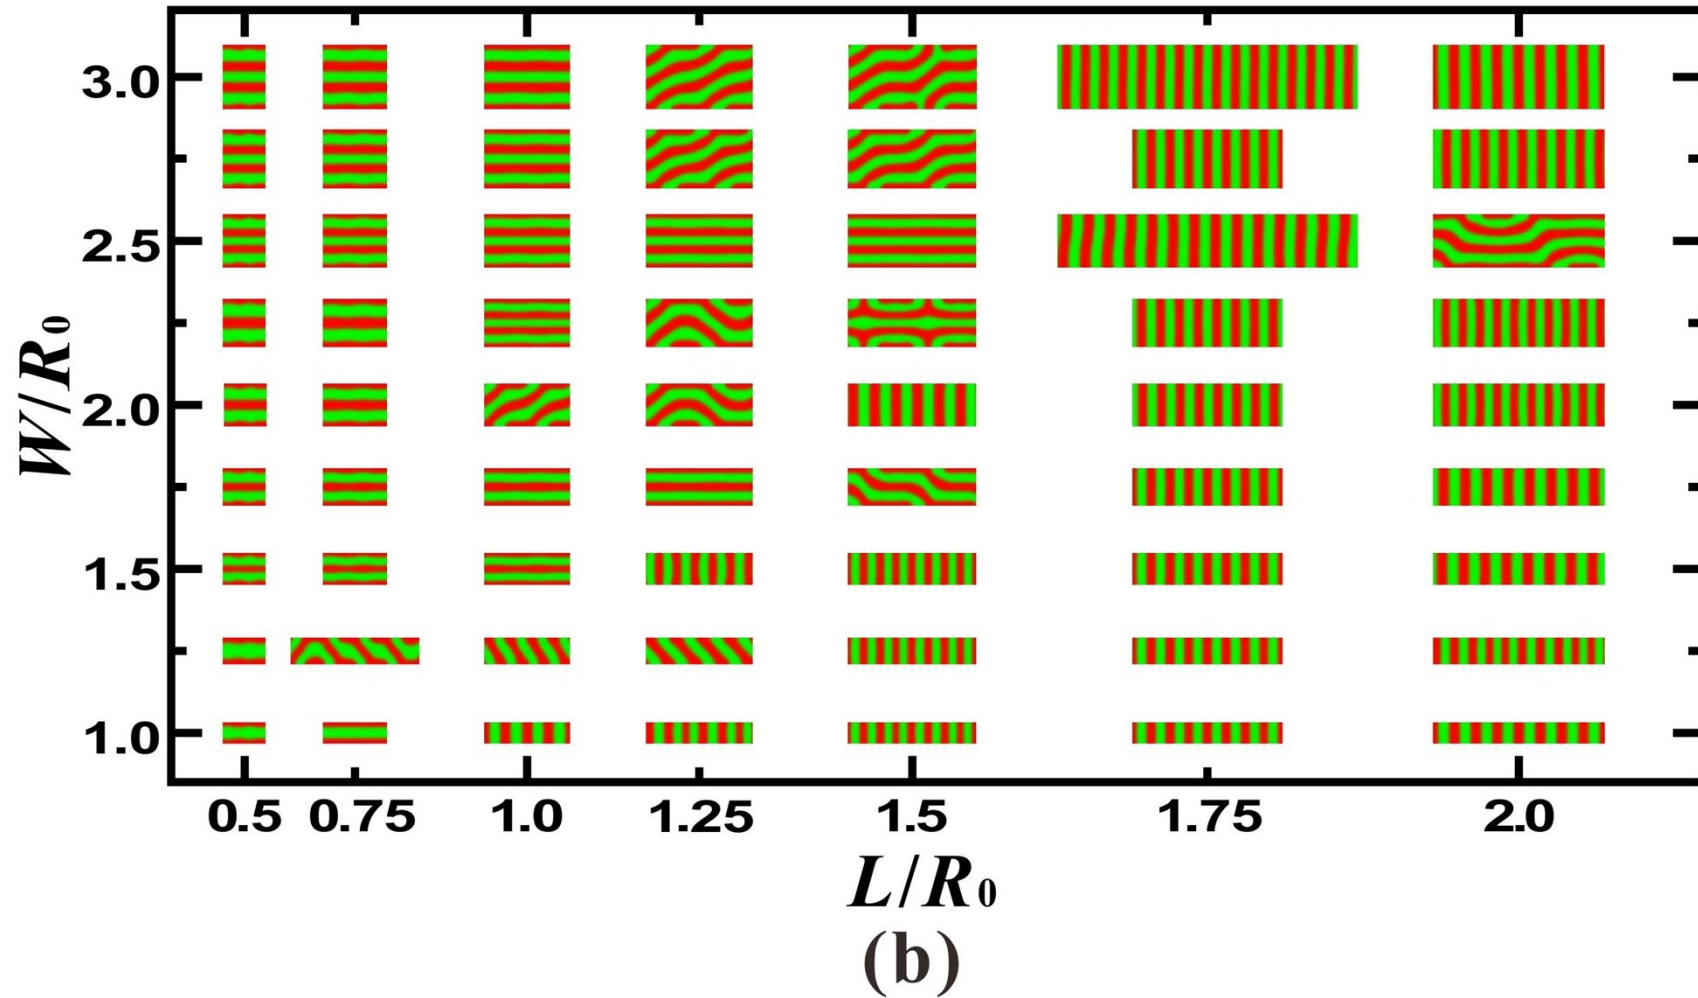

S3 The phase structures are achieved using annealing algorithm when varying the film thickness ( $W$ ) and the size of electrode ( $L$ ) under the alternatively distributed electric field. (a)  $U_{\text{high}} = 20.0$  V, (b)  $U_{\text{high}} = 40.0$  V. Here,  $U_{\text{low}} = 10.0$  V,  $\kappa_{\text{A}} = 6.0$  and  $\kappa_{\text{B}} = 2.5$ . Some of these phase structures in the  $X$ -direction with two periods are also examined.

TABLE I . The free energy of phase structures under alternatively distributed electric field ( $U_{\text{high}} = 20.0$  V).

| $L/R_0$ | $W/R_0$  | A               | P               | V               | S    | $L/R_0$  | $W/R_0$         | A               | P               | V               | S |
|---------|----------|-----------------|-----------------|-----------------|------|----------|-----------------|-----------------|-----------------|-----------------|---|
| 0.50    | 1.00     | 0.408915        | <b>0.408886</b> | 0.413614        | P    | 1.50     | 1.00            | 0.431580        | 0.423068        | <b>0.422690</b> | V |
|         | 1.25     | 0.382348        | 0.383140        | <b>0.382193</b> | V    |          | 1.25            | 0.400457        | 0.396400        | <b>0.390142</b> | V |
|         | 1.50     | 0.368323        | 0.368298        | <b>0.360656</b> | V    |          | 1.50            | 0.378436        | 0.378418        | <b>0.367874</b> | V |
|         | 1.75     | 0.344561        | <b>0.344548</b> | 0.345021        | P    |          | 1.75            | 0.355226        | 0.354172        | <b>0.351540</b> | V |
|         | 2.00     | 0.333181        | <b>0.330088</b> | 0.333181        | P    |          | 2.00            | 0.342868        | <b>0.339121</b> | 0.339158        | P |
|         | 2.25     | 0.332216        | <b>0.322299</b> | 0.323885        | P    |          | 2.25            | 0.332945        | 0.330836        | <b>0.329425</b> | V |
|         | 2.50     | 0.318820        | 0.318823        | <b>0.316442</b> | V    |          | 2.50            | 0.326041        | 0.326219        | <b>0.321571</b> | V |
|         | 2.75     | <b>0.309376</b> | 0.309416        | 0.310330        | A    |          | 2.75            | 0.316267        | 0.316258        | <b>0.315101</b> | V |
| 3.00    | 0.303140 | <b>0.303135</b> | 0.305222        | P               | 3.00 | 0.312313 | <b>0.309589</b> | 0.309684        | P               |                 |   |
| 0.75    | 1.00     | 0.425382        | <b>0.416951</b> | 0.419237        | P    | 1.75     | 1.00            | 0.425420        | 0.423681        | <b>0.423094</b> | V |
|         | 1.25     | 0.396586        | 0.390507        | <b>0.386727</b> | V    |          | 1.25            | 0.392927        | 0.397017        | <b>0.390524</b> | V |
|         | 1.50     | 0.374029        | 0.374002        | <b>0.364531</b> | V    |          | 1.50            | 0.370613        | 0.378865        | <b>0.368201</b> | V |
|         | 1.75     | 0.349878        | 0.349900        | <b>0.348407</b> | V    |          | 1.75            | 0.355205        | 0.354617        | <b>0.351866</b> | V |
|         | 2.00     | 0.339402        | <b>0.335048</b> | 0.336184        | P    |          | 2.00            | 0.342113        | 0.339555        | <b>0.339480</b> | V |
|         | 2.25     | 0.336330        | 0.326859        | <b>0.326609</b> | V    |          | 2.25            | 0.332353        | 0.331266        | <b>0.329725</b> | V |
|         | 2.50     | 0.322666        | 0.322673        | <b>0.318916</b> | V    |          | 2.50            | 0.323540        | 0.326594        | <b>0.321862</b> | V |
|         | 2.75     | 0.314226        | 0.313019        | <b>0.312598</b> | V    |          | 2.75            | 0.317585        | 0.316624        | <b>0.315397</b> | V |
| 3.00    | 0.317191 | <b>0.306518</b> | 0.307322        | P               | 3.00 | 0.312561 | <b>0.309952</b> | 0.309963        | P               |                 |   |
| 1.00    | 1.00     | 0.423529        | 0.420365        | <b>0.420233</b> | V    | 2.00     | 1.00            | 0.429859        | 0.424086        | <b>0.423557</b> | V |
|         | 1.25     | 0.389320        | 0.393734        | <b>0.388013</b> | V    |          | 1.25            | 0.392801        | 0.397415        | <b>0.390896</b> | V |
|         | 1.50     | 0.366821        | 0.376455        | <b>0.365891</b> | V    |          | 1.50            | 0.368526        | 0.379162        | <b>0.368511</b> | V |
|         | 1.75     | 0.352233        | 0.352226        | <b>0.349756</b> | V    |          | 1.75            | 0.355793        | 0.354911        | <b>0.352178</b> | V |
|         | 2.00     | 0.338178        | <b>0.337262</b> | 0.337491        | P    |          | 2.00            | 0.341741        | 0.339868        | <b>0.339758</b> | V |
|         | 2.25     | 0.338228        | 0.329000        | <b>0.327870</b> | V    |          | 2.25            | 0.333436        | 0.331536        | <b>0.329990</b> | V |
|         | 2.50     | 0.324471        | 0.324483        | <b>0.320096</b> | V    |          | 2.50            | 0.323571        | 0.326684        | <b>0.322115</b> | V |
|         | 2.75     | 0.314822        | 0.314704        | <b>0.313713</b> | V    |          | 2.75            | 0.316655        | 0.316877        | <b>0.315633</b> | V |
| 3.00    | 0.308980 | <b>0.308153</b> | 0.308379        | P               | 3.00 | 0.312205 | 0.310204        | <b>0.310178</b> | V               |                 |   |
| 1.25    | 1.00     | 0.422192        | 0.422162        | <b>0.422102</b> | V    | 2.00     | 1.00            | 0.429859        | 0.424086        | <b>0.423557</b> | V |
|         | 1.25     | 0.394154        | 0.395428        | <b>0.389608</b> | V    |          | 1.25            | 0.392801        | 0.397415        | <b>0.390896</b> | V |
|         | 1.50     | 0.377721        | 0.377701        | <b>0.367288</b> | V    |          | 1.50            | 0.368526        | 0.379162        | <b>0.368511</b> | V |
|         | 1.75     | 0.354867        | 0.353462        | <b>0.351000</b> | V    |          | 1.75            | 0.355793        | 0.354911        | <b>0.352178</b> | V |
|         | 2.00     | 0.341313        | <b>0.338434</b> | 0.338626        | P    |          | 2.00            | 0.341741        | 0.339868        | <b>0.339758</b> | V |
|         | 2.25     | 0.331753        | 0.330143        | <b>0.328906</b> | V    |          | 2.25            | 0.333436        | 0.331536        | <b>0.329990</b> | V |
|         | 2.50     | 0.325452        | 0.325637        | <b>0.321075</b> | V    |          | 2.50            | 0.323571        | 0.326684        | <b>0.322115</b> | V |
|         | 2.75     | 0.319134        | 0.315691        | <b>0.314630</b> | V    |          | 2.75            | 0.316655        | 0.316877        | <b>0.315633</b> | V |
| 3.00    | 0.313769 | <b>0.309048</b> | 0.309223        | P               | 3.00 | 0.312205 | 0.310204        | <b>0.310178</b> | V               |                 |   |

A represents the annealing result, P represents the parallel lamellar phase structure, V represents the vertical layered phase structure, and S represents the phase structure with the lowest free energy (red).

TABLE II. The free energy of phase structures under alternatively distributed electric field ( $U_{\text{high}} = 40.0$  V).

| $L/R_0$ | $W/R_0$         | A               | P               | V               | S    | $L/R_0$         | $W/R_0$         | A               | P               | V               | S |
|---------|-----------------|-----------------|-----------------|-----------------|------|-----------------|-----------------|-----------------|-----------------|-----------------|---|
| 0.50    | 1.00            | 0.172391        | <b>0.172386</b> | 0.198704        | P    | 1.50            | 1.00            | 0.292201        | 0.284346        | <b>0.282561</b> | V |
|         | 1.25            | <b>0.196451</b> | 0.196452        | 0.222225        | A    |                 | 1.25            | 0.304789        | 0.300659        | <b>0.295150</b> | V |
|         | 1.50            | <b>0.228062</b> | 0.228197        | 0.233666        | A    |                 | 1.50            | 0.307678        | 0.309819        | <b>0.298014</b> | V |
|         | 1.75            | <b>0.224076</b> | 0.224090        | 0.239387        | A    |                 | 1.75            | 0.301554        | 0.300233        | <b>0.297227</b> | V |
|         | 2.00            | 0.223644        | <b>0.223629</b> | 0.242376        | P    |                 | 2.00            | 0.295084        | <b>0.294762</b> | 0.295067        | P |
|         | 2.25            | <b>0.226654</b> | 0.226663        | 0.244105        | A    |                 | 2.25            | 0.296892        | 0.293064        | <b>0.292457</b> | V |
|         | 2.50            | <b>0.236765</b> | 0.236779        | 0.245203        | A    |                 | 2.50            | 0.293929        | 0.293943        | <b>0.289790</b> | V |
|         | 2.75            | <b>0.234094</b> | 0.234122        | 0.245943        | A    |                 | 2.75            | 0.289311        | 0.287803        | <b>0.287222</b> | V |
| 3.00    | <b>0.233436</b> | 0.233574        | 0.246474        | A               | 3.00 | 0.287784        | <b>0.283961</b> | 0.284841        | P               |                 |   |
| 0.75    | 1.00            | 0.232599        | <b>0.232590</b> | 0.249900        | P    | 1.75            | 1.00            | 0.287587        | 0.289903        | <b>0.286628</b> | V |
|         | 1.25            | 0.259606        | <b>0.250691</b> | 0.264514        | P    |                 | 1.25            | 0.300115        | 0.306148        | <b>0.298639</b> | V |
|         | 1.50            | 0.271623        | <b>0.271618</b> | 0.269194        | P    |                 | 1.50            | 0.302941        | 0.313889        | <b>0.301196</b> | V |
|         | 1.75            | 0.263780        | <b>0.263735</b> | 0.270061        | P    |                 | 1.75            | 0.302129        | 0.304072        | <b>0.300211</b> | V |
|         | 2.00            | 0.259898        | <b>0.259893</b> | 0.269440        | P    |                 | 2.00            | 0.301143        | 0.298655        | <b>0.297902</b> | V |
|         | 2.25            | 0.259753        | <b>0.259751</b> | 0.268284        | P    |                 | 2.25            | 0.298316        | 0.296977        | <b>0.295169</b> | V |
|         | 2.50            | 0.265263        | <b>0.265261</b> | 0.267014        | P    |                 | 2.50            | 0.293789        | 0.297300        | <b>0.292386</b> | V |
|         | 2.75            | <b>0.260471</b> | 0.260511        | 0.265781        | A    |                 | 2.75            | 0.291957        | 0.291036        | <b>0.289737</b> | V |
| 3.00    | <b>0.257953</b> | 0.257987        | 0.264632        | A               | 3.00 | 0.290756        | <b>0.287179</b> | 0.287252        | P               |                 |   |
| 1.00    | 1.00            | 0.261072        | <b>0.260689</b> | 0.261067        | P    | 2.00            | 1.00            | 0.287214        | 0.293595        | <b>0.287197</b> | V |
|         | 1.25            | 0.285426        | 0.277487        | <b>0.276503</b> | V    |                 | 1.25            | 0.307410        | 0.309887        | <b>0.299667</b> | V |
|         | 1.50            | 0.292331        | 0.292301        | <b>0.281211</b> | V    |                 | 1.50            | 0.304366        | 0.316599        | <b>0.302459</b> | V |
|         | 1.75            | 0.283399        | 0.283399        | <b>0.281756</b> | V    |                 | 1.75            | 0.303151        | 0.306924        | <b>0.301609</b> | V |
|         | 2.00            | 0.283363        | <b>0.278584</b> | 0.280651        | P    |                 | 2.00            | 0.306382        | 0.301310        | <b>0.299380</b> | V |
|         | 2.25            | 0.288617        | <b>0.277346</b> | 0.278935        | P    |                 | 2.25            | 0.303585        | 0.299462        | <b>0.296687</b> | V |
|         | 2.50            | 0.280270        | 0.280291        | <b>0.277055</b> | V    |                 | 2.50            | 0.297208        | 0.299600        | <b>0.293925</b> | V |
|         | 2.75            | <b>0.274642</b> | <b>0.274642</b> | 0.275210        | A/P  |                 | 2.75            | 0.293626        | 0.293332        | <b>0.291266</b> | V |
| 3.00    | <b>0.271358</b> | <b>0.271358</b> | 0.273479        | A/P             | 3.00 | <b>0.288786</b> | 0.289383        | <b>0.288786</b> | A/V             |                 |   |
| 1.25    | 1.00            | 0.281406        | <b>0.275646</b> | 0.277064        | P    | 2.00            | 1.00            | 0.287214        | 0.293595        | <b>0.287197</b> | V |
|         | 1.25            | 0.293392        | 0.292000        | <b>0.290074</b> | V    |                 | 1.25            | 0.307410        | 0.309887        | <b>0.299667</b> | V |
|         | 1.50            | 0.297003        | 0.303370        | <b>0.293036</b> | V    |                 | 1.50            | 0.304366        | 0.316599        | <b>0.302459</b> | V |
|         | 1.75            | 0.293987        | 0.293987        | <b>0.292386</b> | V    |                 | 1.75            | 0.303151        | 0.306924        | <b>0.301609</b> | V |
|         | 2.00            | 0.291289        | <b>0.288779</b> | 0.290377        | P    |                 | 2.00            | 0.306382        | 0.301310        | <b>0.299380</b> | V |
|         | 2.25            | 0.288001        | <b>0.287227</b> | 0.287909        | P    |                 | 2.25            | 0.303585        | 0.299462        | <b>0.296687</b> | V |
|         | 2.50            | 0.288754        | 0.288754        | <b>0.285414</b> | V    |                 | 2.50            | 0.297208        | 0.299600        | <b>0.293925</b> | V |
|         | 2.75            | 0.284296        | <b>0.282790</b> | 0.283022        | P    |                 | 2.75            | 0.293626        | 0.293332        | <b>0.291266</b> | V |
| 3.00    | 0.281580        | <b>0.279162</b> | 0.280809        | P               | 3.00 | <b>0.288786</b> | 0.289383        | <b>0.288786</b> | A/V             |                 |   |

A represents the annealing result, P represents the parallel lamellar phase structure, V represents the vertical layered phase structure, and S represents the phase structure with the lowest free energy (red).
